# Supplementary material for: Machine learning for identification of silylated derivatives from mass spectra
Source: J Cheminform. 2022 Sep 15;14:62. doi: 10.1186/s13321-022-00636-1 (PMC9476372; doi:10.1186/s13321-022-00636-1)
Supplement: Supplementary file 2 — Additional file 2. Environmental relevance evaluation of the selected compounds according to the RPMBT system. [file 13321_2022_636_MOESM2_ESM.xlsx]

## Sheet: Sheet1
Machine learning for identification of silylated derivatives from mass spectra Milka Ljoncheva †, ‡, Tomaž Stepišnik ∫, ‡, Tina Kosjek †, ‡, Sašo Džeroski ∫, ‡, * † Jozef Stefan Institute, Department of Environmental Sciences, Jamova 39, 1000 Ljubljana, Slovenia ∫ Jozef Stefan Institute, Department of Knowledge Technologies, Jamova 39, 1000 Ljubljana, Slovenia ‡ Jozef Stefan International Postgra…
Physical properties and toxicity endpoint estimations were performed using the consensus method of the T.E.S.T. tool, where toxicity endpoints are estimated by averaging the predicted values from 4 QSAR methods (hierarchical, single model, group contribution and nearest neighbor method, as described in … et al.[1]), and ML-based models of EPI SuiteTM, KOWWINTM that estimates the log KOW coefficie…
Results of environmental relevance evaluation of the candidate compounds for generation of test dataset. The fulfilled criteria are marked in red. wet-wt- wet weight tissue; *- not predicted.
Compound abbreviation	presence in US EPA CCD	COMPTOX-T.E.S.T.				EPI SuiteTM
		96-hour fathead minnow LC50	developmental toxicity	estrogen receptor binding affinity	log Kow	log Koc	water solubility (mg/L)	BCF (L/kg wet-wt)	BAF (L/kg wet-wt)	biotransformation half-life (days, normalized to 10 g fish)	half-life in river (days)	half-life in lake (days)	ChV (mg/L)
													fish	daphnid	green algae
CBD	DTXSID00871959	6.645 -Log10(mol/L)	TRUE	TRUE	8.01	5.67	0.0055	4242	124.2	1.511	37950	414 x 103	0.001	0.0008	0.02
		0.071 mg/L
CBN	DTXSID3048996	6.690 -Log10(mol/L)	TRUE	TRUE	7.23	5.52	0.0021	91.63	149.6	0.999	6910	75390	0.001	0.0001	0.021
		0.063 mg/L
THC	DTXSID6021327	6.211 -Log10(mol/L)	TRUE	TRUE	6.97	5.52	0.043	443.4	2150	3.224	177.4	1941	0.0007	0.002	0.013
		0.193 mg/L
CBC	DTXSID80942873	6.722 -Log10(mol/L)	TRUE	TRUE	7.98	5.52	0.006	256.6	47550	14	189	2068	0.002	0.0005	0.002
		0.060 mg/L
CBDA	DTXSID80154318	6.803 -Log10(mol/L)	TRUE	TRUE	7.99	5.18	0.003	12.97	20.11	0.62	1604 x 103	175 x 105	0.012	0.01	0.23
		0.056 mg/L
THCA	DTXSID30178701	6.341 -Log10(mol/L)	TRUE	TRUE	7.57	4.57	0.007	97.06	502.3	2.062	7462	81410	0.008	0.025	0.153
		0.163 mg/L
DF	DTXSID6022923	5.868 -Log10(mol/L)	TRUE	FALSE	4.02	2.61	4.518	1415	1491	6.129	8876 x 103	9682 x 104	4.584	4.216	16.415
		0.401 mg/L
RES	DTXSID2021238	3.406 -Log10(mol/L)	TRUE	TRUE	0.98	1.7	8.571 x 104	1.12	1.12	0.0131	259.1 x 103	2826 x 103	14.176	101.47	0.568
		43.265 mg/L
IB	DTXSID5020732	4.578 -Log10(mol/L)	TRUE	TRUE	3.79	2.35	41.05	436.3	437	1.875	230.6	2520	4.939	4.305	15.574
		5.452 mg/L
KET	DTXSID6020771	4.949 -Log10(mol/L)	TRUE	TRUE	3	2.08	120.4	95.91	95.92	0.74	1835 x 103	2002 x 104	28.783	20.737	57.725
		2.863 mg/L
NAP	DTXSID4040686	4.707 -Log10(mol/L)	TRUE	TRUE	3.1	1.97	144.9	131.8	131.8	1.74	109.2 x 103	1191 x 103	21.31	15.737	45.32
		4.521 mg/L
CLA	DTXSID1040661	3.814 -Log10(mol/L) 32.968 mg/L	TRUE	FALSE	2.84	1.63	582.5	37.96	37.96	1.662	1632	17810	33.001	22.899	60.535
PAA	DTXSID2021656	3.354 -Log10(mol/L)	TRUE	TRUE	1.43	0.94	1.348 x 104	3.06	3.062	0.118	694.3	7578	334.996	165.441	273.93
		0.318 mg/L
TCS	DTXSID5032498	6.391 -Log10(mol/L)	TRUE	TRUE	4.66	3.93	4.621	1094	1127	3.293	1949	21270	0.071	0.089	0.756
		0.118 mg/L
IBuPb	DTXSID4020749	4.527 -Log10(mol/L)	TRUE	TRUE	3.4	2.91	223.7	21.56	21.56	0.055	4709	51380	0.223	3.252	0.978
		5.766 mg/L
BuPb	DTXSID3020209	4.596 -Log10(mol/L)	TRUE	TRUE	3.47	3	159	26.52	26.52	0.0658	5666	61820	0.199	2.862	0.89
		4.928 mg/L
CLP	DTXSID5020154	5.332 -Log10(mol/L)	TRUE	TRUE	4.18	3.08	112	89.11	89.11	0.268	13360	145.8 x 103	0.116	0.126	1.131
		1.017 mg/L
BA	DTXSID6020143	3.080 -Log10(mol/L)	TRUE	TRUE	1.87	1.19	2493	6.514	6.514	0.106	707.6	7723	125.419	68.937	132.29
		101.501 mg/L
BzPb	DTXSID9022526	4.934 -Log10(mol/L)	TRUE	TRUE	3.7	3	107.8	9.803	9.803	0.0219	1284 x 103	1401 x 104	0.162	2.237	0.774
		2.655 mg/L
IPrPb	DTXSID3052858	3.985 -Log10(mol/L)	TRUE	TRUE	2.91	2.64	689.7	13.7	13.7	0.0396	4645	50680	0.443	7.09	1.706
		18.672 mg/L
BPC	DTXSID8047890	5.308 -Log10(mol/L)	TRUE	TRUE	4.74	3.88	7.459	112.6	112.6	0.271	3487 x 103	3804 x 104	0.117	0.269	0.128
		1.262 mg/L
BPB	DTXSID4022442	5.148 -Log10(mol/L)	TRUE	TRUE	4.13	3.54	29.23	170.2	170.3	0.455	3113 x 103	3396 x 104	0.276	0.766	0.177
		1.725 mg/L
HPP	DTXSID3022536	4.879 -Log10(mol/L)	TRUE	TRUE	4.12	3.37	43.27	243.5	243.6	0.696	404	4412	0.1224	0.132	1.19
		2.803 mg/L
DH-BP	DTXSID8022406	4.486 -Log10(mol/L)	TRUE	FALSE	2.96	3.09	413.4	9.2	9.2	0.235	1347 x 103	147 x 105	1.454	5.766	0.327
		6.989 mg/L
BPM	DTXSID7065548	5.939 -Log10(mol/L)	TRUE	TRUE	6.25	4.72	0.113	1970	9079	7.044	3153 x 103	344 x 106	0.01	0.023	0.066
		0.399 mg/L
BPS	DTXSID3022409	4.165 -Log10(mol/L)	TRUE	TRUE	1.65	2.2	3518	3.535	3.535	0.0454	1,429 x 1010	1,559 x 1011	12.641	74.993	0.877
		17.124 mg/L
BPE	DTXSID3047891	4.945 -Log10(mol/L)	TRUE	TRUE	3.19	3.02	265	45.61	45.61	0.153	5175 x 103	5646 x 104	1.031	3.816	0.284
		2.432 mg/L
22BPF	DTXSID4022446	4.965 -Log10(mol/L)	TRUE	TRUE	3.06	2.95	408.1	33.78	33.78	0.115	2397 x 104	2615 x 105	1.182	4.56	0.288
		2.168 mg/L
BPAF	DTXSID7037717	5.547 -Log10(mol/L)	TRUE	TRUE	4.47	3.73	4.302	643	639.3	1.934	78760	859.2 x 103	0.228	0.571	0.198
		0.954 mg/L
BPCL	DTXSID5022485	5.985 -Log10(mol/L)	TRUE	TRUE	3.75	3.33	37,93	227.5	227.6	0.881	5902 x 104	6439 x 105	0.185	0.073	1.475
		0.291 mg/L
BPF	DTXSID9022445	4.669 -Log10(mol/L)	TRUE	TRUE	3.06	2.87	542.8	28.02	28.012	0.104	2397 x 104	2615 x 105	1.182	4.56	0.288
		4.289 mg/L
BPP	DTXSID0058693	5.957 -Log10(mol/L)	TRUE	TRUE	6.25	4.72	29.23	1970	9079	7.044	3153 x 104	344 x 105	0.276	0.766	0.177
		0.383 mg/L
BP26DM	DTXSID8047973	5.893 -Log10(mol/L)	TRUE	TRUE	5.83	4.48	0.601	83.39	83.54	0.222	3025 x 103	330 x 105	0.024	0.04	0.071
		0.364 mg/L
24BPF	DTXSID2044890	4.905 -Log10(mol/L)	TRUE	TRUE	3.06	2.95	408.1	33.78	33.78	0.115	2397 x 104	2615 x 105	1.182	4.56	0.288
		2.494 mg/L
BPAP	DTXSID5051444	5.579 -Log10(mol/L)	TRUE	TRUE	4.86	3.95	3.758	249.7	250.1	0.616	7463 x 104	8141 x 105	0.11	0.243	0.134
		0.766 mg/L
BPA	DTXSID7020182	4.860 -Log10(mol/L)	TRUE	TRUE	3.64	3.1	172.7	172.7	172.8	0.263	4024 x 103	439 x 105	0.55	1.773	0.227
		3.151 mg/L
BPPH	DTXSID9058654	7.427 -Log10(mol/L)	TRUE	TRUE	7.17	5.23	0.012	192.8	585.9	1.915	8812 x 105	9613 x 106	0.004	0.005	0.041
		0.014 mg/L
MePb	DTXSID4022529	3.590 -Log10(mol/L)	TRUE	TRUE	2	2.11	6864	3.883	3.883	0.0211	13490	147.2 x 103	1.538	29.078	4.633
		39.103 mg/L
EtPb	DTXSID9022528	3.768 -Log10(mol/L)	TRUE	TRUE	2.49	2.39	1984	8.151	8.151	0.0295	10450	114 x 103	0.783	13.517	2.691
		28.358 mg/L
PrPb	DTXSID4022527	4.158 -Log10(mol/L)	TRUE	TRUE	2.98	2.71	529.3	15.62	15.62	0.043	7706	84.07 x 103	0.396	6.239	1.552
		12.527 mg/L
AA	DTXSID7021605	3.172 -Log10(mol/L)	TRUE	FALSE	0.23	0.2	1.673 x 105	0.9942	0.9942	0.0934	6261 x 103	6831 x 104	3777.32	1397.58	1556.61
		98.418 mg/L
BP-8	DTXSID3022403	4.958 -Log10(mol/L)	TRUE	TRUE	3.82	3.62	757.4	47.12	47.12	0.118	19350	211.1 x 103	122.589	38.723	43.862
		2.688 mg/L
4,4’-BP	DTXSID1029120	4.529 -Log10(mol/L)	TRUE	TRUE	2.8	2.81	798.2	43.33	43.33	0.315	5177 x 103	5648 x 104	1.63	6.805	0.316
		5.506 mg/L
4-NP	DTXSID5033836	5.994 -Log10(mol/L)	TRUE	TRUE	5.99	4.28	1.57	221	223.4	1.328	1.128	17.49	0.006	0.012	0.088
		0.223 mg/L
BHT	DTXSID2020216	5.290 -Log10(mol/L)	TRUE	FALSE	5.03	3.91	5.748	798	820.5	1.154	10.78	122.8	0.03	0.042	0.343
		1.131 mg/L
E1	DTXSID4022367	5.401 -Log10(mol/L)	TRUE	TRUE	3.43	3.02	146.8	13.1	13.1	0.034	1056 x 102	1152 x 103	0.477	0.415	4.032
		1.075 mg/L
E2	DTXSID0020573	5.464 -Log10(mol/L)	TRUE	TRUE	3.94	2.9	81.97	35.05	35.05	0.0835	2855 x 104	3115 x 105	0.212	0.214	1.97
		0.937 mg/L
E3	DTXSID9022366	5.232 -Log10(mol/L)	TRUE	TRUE	2.81	1.62	440.8	5.68	5.68	0.018	3115 x 104	3398 x 105	1.377	0.995	10.347
		1.690 mg/L
EE2	DTXSID5020576	5.467 -Log10(mol/L)	TRUE	TRUE	4.12	2.71	116.4	13.95	13.95	0.032	529 x 104	5771 x 104	0.175	0.186	1.679
		1.011 mg/L
CBZ	DTXSID4022731	*	TRUE	FALSE	2.25	2.23	17.66	19.3	19.3	0.15	3472 x 102	3788 x 103	0.901	1.171	0.13
SFA	DTXSID4023622	*	TRUE	FALSE	-0.55	0.72	2.032 x 105	0.9027	0.9027	0.015	2148 x 102	2344 x 103	8.695	0.118	11.256
BPBP	DTXSID70283308	6.323 -Log10(mol/L)	TRUE	TRUE	6.08	4.62	0.147	385.1	416.4	1.149	1,351 x 109	1,474 x 1010	0.011	0.032	0.075
		0.167 mg/L
BPFL	DTXSID5037731	7.005 -Log10(mol/L)	TRUE	TRUE	6.08	4.62	0.012	896.7	1288	2.747	3.87 x 109	4,222 x 1010	0.011	0.032	0.075
		0.035 mg/L
BPZ	DTXSID4047963	5.532 -Log10(mol/L)	TRUE	TRUE	5	4.02	3.782	271.4	272.1	0.669	4229 x 103	4613 x 104	0.081	0.173	0.113
		0.789 mg/L
9-HF	DTXSID4052683	4.587 -Log10(mol/L)	TRUE	TRUE	2.71	2.01	65.44	31.24	31.24	0.19	7007	76440	1.35	2.188	3.85
		4.719 mg/L
ERY	DTXSID6043919	0.957 -Log10(mol/L)	TRUE	TRUE	-2.11	-1.16	1.0 x 106	0.8931	0.8931	0.0007	87530	954.9 x 103	30492.9	6438.95	3317.56
		13493.125 mg/L
SA	DTXSID7026368	3.148 -Log10(mol/L)	TRUE	TRUE	2.24	1.57	3808	11.96	11.96	0.093	3906	42620	16.358	9.6982	110.414
		98.337 mg/L
UA	DTXSID4021426	2.111 -Log10(mol/L)	TRUE	FALSE	-1.56	-0.25	4.259 x 105	0.8932	0.8932	0.0003	1087 x 104	1185 x 105	5106.28	1230.64	760.407
		465.068 mg/L
SHA	DTXSID4032039	2.329 -Log10(mol/L)	TRUE	FALSE	-1.34	-1.41	1.0 x 106	0.8945	0.8945	0.011	1.197 x 109	1,306 x 1010	29.025	2.316	1509.98
		817.379 mg/L
QA	DTXSID70998288	1.555 -Log10(mol/L)	TRUE	FALSE	-2.45	-2.02	1.0 x 106	0.8931	0.8931	0.0022	4456 x 103	4861 x 104	9.4 x 105	1.83 x 105	84102.1
		5349.997 mg/L
4-OP	DTXSID9022360	4.655 -Log10(mol/L)	TRUE	TRUE	5.28	4.01	3.114	365.3	368.4	2.361	5.147	61.17	0.013	0.021	0.165
		4.567 mg/L
H-BP	DTXSID5036684	4.381 -Log10(mol/L)	TRUE	FALSE	2.67	2.99	405.8	41.57	41.57	0.153	17 x 104	1855 x 103	1.1963	0.825	8.72
		8.250 mg/L
DHDPE	DTXSID8022169	4.570 -Log10(mol/L)	TRUE	TRUE	3.09	3.02	373.1	40.32	40.32	0.143	8162 x 103	8904 x 104	1.134	4.329	0.285
		5.443 mg/L
LSER	DTXSID60883230	1.735 -Log10(mol/L)	TRUE	FALSE	-3.46	-1.98	4.02 x 105	0.893	0.893	0.006	458 x 105	4997 x 106	3.12 x 105	3174.3	29833.2
		1935.536 mg/L
LAA	DTXSID5020106	1.031 -Log10(mol/L)	TRUE	FALSE	-1.88	-0.99	1.0 x 106	0.8933	0.8933	0.0002	795.5	8683	737.793	28543.2	782.842
		16418.176 mg/L
LLEU	DTXSID9023203	2.728 -Log10(mol/L)	TRUE	FALSE	-1.59	-0.71	1.538 x 104	0.8949	0.8949	0.038	8006	87340	11969.4	247.546	2093.9
		245.295 mg/L
LTYR	DTXSID1023730	3.302 -Log10(mol/L)	TRUE	TRUE	-1.76	-0.83	9.71 x 104	0.8933	0.8933	0.009	2627000000	2,866 x 1010	488.256	142.166	114.256
		90.439 mg/L
CA	DTXSID3020332	2.280 -Log10(mol/L)	TRUE	FALSE	-1.67	-1.16	1.0 x 106	0.8942	0.8942	0.023	7,809 x 108	8,519 x 109	64683.4	17465.9	12617.3
		1008.328 mg/L
4NG	DTXSID4062935	3.879 -Log10(mol/L)	TRUE	FALSE	1.73	2.32	2055	3.882	3.882	0.041	7130	77780	4.55	2.385	27.882
		22.370 mg/L
5NG	DTXSID1047021	3.710 -Log10(mol/L)	TRUE	FALSE	1.73	2.32	2055	3.882	3.882	0.041	7130	77780	4.55	2.385	27.882
		32.963 mg/L
6NG	DTXSID60449158	3.994 -Log10(mol/L)	TRUE	FALSE	1.73	2.32	2055	3.882	3.882	0.041	76.69	841.2	4.55	2.385	27.882
		17.159 mg/L
CAT	DTXSID3020257	3.449 -Log10(mol/L)	TRUE	TRUE	1.03	1.75	7.323 x 104	1.17	1.17	0.139	21330	232.7 x 103	14.176	101.47	0.568
		39.139 mg/L
3MC	DTXSID9060071	3.617 -Log10(mol/L)	TRUE	TRUE	1.58	2.13	1.648 x 104	2.068	2.068	0.014	313100	3416 x 103	6.941	42.027	0.454
		29.996 mg/L
3M5NC	-	4.040 -Log10(mol/L)	TRUE	TRUE	1.98	2.57	4853	2.217	2.217	0.007	43940000	4794 x 105	5.177	27.776	0.482
		15.426 mg/L
4NC	DTXSID10186804	3.657 -Log10(mol/L)	TRUE	TRUE	1.43	2.34	1.047 x 104	1.908	1.908	0.01	4508 x 104	4918 x 105	10.932	69.335	0.624
		34.179 mg/L
SYR	DTXSID2052607	3.036 -Log10(mol/L)	FALSE	TRUE	1.16	1.83	7578	1.833	0.0469	0.047	131.2	1435	10.355	4.581	56.963
		141.838 mg/L
4-NS	-	3.879 -Log10(mol/L)	TRUE	FALSE	1.73	2.32	2064	3.882	3.882	0.041	7130	77780	613.909	133.749	2152.45
		22.370 mg/L
COD	DTXSID2020341	5.285 -Log10(mol/L)	TRUE	TRUE	1.28	1.22	1.215 x 104	1.635	1.635	0.023	5,568 x 108	6,075 x 109	0.287	0.06	16.287
		1.555 mg/L
AMP	DTXSID4022600	3.400 -Log10(mol/L)	TRUE	FALSE	1.76	1.88	2.803 x 104	5.953	5.953	0.182	26.31	291.1	2.388	0.348	1.237
		53.837 mg/L
MAMP	DTXSID8037128	3.512 -Log10(mol/L)	TRUE	FALSE	2.22	2.03	1.329 x 104	11.84	11.84	0.367	12.63	142	1.104	0.211	0.665
		45.947 mg/L
MORPH	DTXSID9023336	5.366 -Log10(mol/L)	TRUE	TRUE	0.72	1.16	2.642 x 104	1.035	1.035	0.005	3,098 x 1011	3,38 x 1012	0.505	0.085	28.09
		1.230 mg/L
BZECG	DTXSID7046758	5.082 -Log10(mol/L)	TRUE	TRUE	-1.32	-0.71	1605	0.8939	0.8939	0.005	4029 x 105	4395 x 106	5050.13	1.76 X 105	6235.46
		2.395 mg/L
T3HC	DTXSID60436881	2.713 -Log10(mol/L)	TRUE	TRUE	-1.2	-0.18	4.946 x 105	0.8936	0.8936	0.0008	6504 x 104	7096 x 105	2.849	363.281	42.777
		372.332 mg/L
11-OH-THC	DTXSID50190061	6.227 -Log10(mol/L)	TRUE	TRUE	6.13	3.69	2.802	194.1	194.6	0.48	4966 x 103	5418 x 104	0.008	0.015	0.108
		0.196 mg/L
11N9THC	DTXSID8074788	6.477 -Log10(mol/L)	TRUE	TRUE	6.36	3.9	0.2335	664.8	1084	2.396	6211 x 104	6775 x 105	0.055	0.115	0.815
		0.115 mg/L
8-HQ	DTXSID5020730	4.011 -Log10(mol/L)	TRUE	TRUE	1.66	2.12	424.4	4.674	4.674	0.043	51.62	567.3	4.374	2.245	26.447
		14.153 mg/L
6-MAM	DTXSID60182154	5.696 -Log10(mol/L)	TRUE	TRUE	1.72	1.87	4093	1.538	1.537	0.002	5,085 x 109	5,548 x 1010	0.094	1.257	1.368
		0.659 mg/L
ET	DTXSID5023031	1.685 -Log10(mol/L)	TRUE	TRUE	-0.82	0.15	7986	0.8961	0.8961	0.006	2,099 x 1010	2,29 x 1011	1.55	0.921	1.982
		4630.077 mg/L
PCA	DTXSID30901076	4.408 -Log10(mol/L)	TRUE	TRUE	1.59	1.31	2.709 x 104	6.45	6.45	0.216	125 x 105	1364 x 106	55.512	27.888	331.108
		6.417 mg/L
MCA	DTXSID00891551	4.404 -Log10(mol/L)	TRUE	FALSE	1.59	1.2	2.709 x 104	4.409	4.409	0.188	125 x 105	1364 x 106	55.512	27.888	331.108
		6.480 mg/L
OCA	DTXSID10883240	4.502 -Log10(mol/L)	TRUE	FALSE	1.59	1.2	2.709 x 104	4.409	4.409	0.188	125 x 105	1364 x 106	55.512	27.888	331.108
		5.163 mg/L
NX	DTXSID4046284	4.449 -Log10(mol/L)	TRUE	FALSE	2.06	2.41	3726	3.747	3.747	0.019	2,129 x 107	2,323 x 108	3.039	1.754	19.802
		6.766 mg/L
17HP	DTXSID6040747	4.813 -Log10(mol/L)	TRUE	FALSE	3.08	2.66	51.54	101.2	101.2	0.69	4391	47910	0.549	0.569	3.589
		5.088 mg/L
6HP	-	4.997 -Log10(mol/L)	TRUE	FALSE	3.41	2.18	26.58	191.8	191.9	1.547	13160	143.6 x 103	0.126	0.036	7.332
		3.350 mg/L
5AD	DTXSID40961166	5.490 -Log10(mol/L)	TRUE	FALSE	2.84	3.55	184	272.4	272.1	2.366	65.65	722.1	13.877	6.2	10.855
		0.920 mg/L
BD	DTXSID20894201	5.464 -Log10(mol/L)	TRUE	FALSE	3.05	2.34	117.4	98.2	98.2	1.277	25020	273 x 103	8.744	4.19	8.01
		0.984 mg/L
11HT	-	5.128 -Log10(mol/L)	TRUE	FALSE	2.14	1.48	3496	13.76	13.76	0.424	33 x 104	36 x 105	176.107	54.013	58.958
		2.265 mg/L
11HAD	DTXSID801019361	4.768 -Log10(mol/L)	TRUE	FALSE	1.22	1.58	173	2.401	2.401	0.166	3142 x 104	3428 x 105	504.861	133.117	120.176
		5.159 mg/L
ST	DTXSID9022364	4.784 -Log10(mol/L)	TRUE	FALSE	3.07	2.67	41.97	250.3	250.4	1.791	417.4 x 103	4554 x 103	2.89	2.115	6.018
		4.775 mg/L
2APA	DTXSID20357543	4.866 -Log10(mol/L)	TRUE	FALSE	2.73	2.04	81.77	150.7	150.7	0.667	4266 x 103	4654 x 104	43.95	29.65	75.406
		3.096 mg/L
