# Supplementary material for: Machine learning for identification of silylated derivatives from mass spectra
Source: J Cheminform. 2022 Sep 15;14:62. doi: 10.1186/s13321-022-00636-1 (PMC9476372; doi:10.1186/s13321-022-00636-1)
Supplement: Supplementary file 4 — Additional file 4. Chemical structures, IUPAC names, common names and abbreviations, CAS numbers and molecular weights of the CECs and their TMS derivatives from the test dataset. [file 13321_2022_636_MOESM4_ESM.xlsx]

## Sheet: Sheet1
Machine learning for identification of silylated derivatives from mass spectra Milka Ljoncheva †, ‡, Tomaž Stepišnik ∫, ‡, Tina Kosjek †, ‡, Sašo Džeroski ∫, ‡, * † Jozef Stefan Institute, Department of Environmental Sciences, Jamova 39, 1000 Ljubljana, Slovenia ∫ Jozef Stefan Institute, Department of Knowledge Technologies, Jamova 39, 1000 Ljubljana, Slovenia ‡ Jozef Stefan International Postgra…
IUPAC name, common name	chemical structure	CAS number	Mw	IUPAC name, common name, abbreviation of the TMS derivative	chemical structure	CAS number TMS derivative	Mw TMS derivative
benzoic acid		65-85-0	122.123	trimethylsilyl benzoate		2078-12-08	194.076
benzoic acid				benzoic acid trimethylsilyl ester
(BA)				(BA-TMS)
methyl 4-hydroxybenzoate		99-76-3	152.149	methyl 4-trimethylsilyloxybenzoate		27739-17-9	224.087
methylparaben				methylparaben trimethylsilyl ether
				(MePb-TMS)
2-hydroxybenzoic acid		69-72-7	138.122	-		5674-98-6	210.3
salicylic acid				trimethylsilyl 2-hydroxybenzoate
				(SA-TMS)
				trimethylsilyl 2-trimethylsilyloxybenzoate		3789-85-3	282.111
(SA)				(trimethylsilyl ester) salicylic acid trimethylsilyl ether
				(SA-2TMS)
ethyl 4-hydroxybenzoate		120-47-8	166.167	ethyl 4-trimethylsilyloxybenzoate		-	238.103
ethylparaben				ethylparaben trimethylsilyl ether
(EtPb)				(EtPb-TMS)
propan-2-yl 4-hydroxybenzoate		4191-73-5	180.203	propan-2-yl 4-trimethylsilyloxybenzoate		-	252.118
isopropylparaben				isopropylparaben trimethylsilyl ester
(IPrPb)				(IPrPb-TMS)
2-[4-(2-methylpropyl)phenyl]propanoic acid		15687-27-1	206.285	trimethylsilyl 2-[4-(2-methylpropyl)phenyl]propanoate		74810-89-2	278.17
ibuprofen				ibuprofen trimethylsilyl ester
(IB)				(IB-TMS)
propyl 4-hydroxybenzoate		94-13-3	180.203	propyl 4-trimethylsilyloxybenzoate		27739-19-1	252.118
propylparaben				propylparaben trimethylsilyl ether
(PrPb)				(PrPb-TMS)
2-methylpropyl 4-hydroxybenzoate		4247-02-3	194.23	isobutylparaben trimethylsilyl ether		-	266.134
isobutylparaben (iBuPb)				(iBuPb-TMS)
butyl 4-hydroxybenzoate		94-26-8	194.23	butyl 4-trimethylsilyloxybenzoate		-	266.134
butylparaben				butylparaben trimethylsilyl ether
(BuPb)				(BuPb-TMS)
(3R,4S,5R)-3,4,5-trihydroxycyclohexene-1-carboxylic acid		138-59-0	174.152	trimethylsilyl (3R,4S,5R)-3,4,5-tris(trimethylsilyloxy)cyclohexene-1-carboxylate		55520-78-0	462.211
shikimic acid				(trimethylsilyl ester) shikimic acid tris-trimethylsilyl ether
(SHA)				(SHA-4TMS)
(3R,5R)-1,3,4,5-tetrahydroxycyclohexane-1-carboxylic acid		77-95-2	194.23	trimethylsilyl (3R,5R)-1,3,4,5-tetrakis(trimethylsilyloxy)cyclohexane-1-carboxylate		-	552.261
(-)-quinic acid				quinic acid trimethylsilyl ester tris-trimethylsilyl ether
(QA)				(QA-5TMS)
5-chloro-2-(2,4-dichlorophenoxy)phenol		3380-34-5	289.536	[5-chloro-2-(2,4-dichlorophenoxy)phenoxy]-trimethylsilane		-	359.991
triclosan				triclosan trimethylsilyl ether
(TCS)				(TCS-TMS)
benzyl 4-hydroxybenzoate		94-18-8	228.247	benzyl 4-trimethylsilyloxybenzoate		-	300.118
benzylparaben				benzylparaben trimethylsilyl ether
(BzPb)				(BzPb-TMS)
2-[(1S,6S)-3-methyl-6-prop-1-en-2-ylcyclohex-2-en-1-yl]-5-pentylbenzene-1,3-diol		13956-29-1	314.469	trimethyl-[2-(3-methyl-6-prop-1-en-2-ylcyclohex-2-en-1-yl)-5-pentyl-3-trimethylsilyloxyphenoxy]silane		-	458.304
(+)-cannabidiol				cannabidiol, di-trimethylsilyl
(CBD)				(CBD-2TMS)
benzene-1,3-diol		108-46-3	110.112			4520-29-0	254.116
resorcinol				trimethyl-(3-trimethylsilyloxyphenoxy)silane
(RES)				resorcinol-bis-trimethylsilyl ether
				(RES-2TMS)
2-(4-chlorophenoxy)-2-methylpropanoic acid		882-09-7	214.265	trimethylsilyl 2-(4-chlorophenoxy)-2-methylpropanoate		55255-67-9	286.079
clofibric acid				clofibric acid trimethylsilyl ester
(CLA)				(CLA-TMS)
9H-fluoren-9-ol		1689-64-1	182.222	9H-fluoren-9-yloxy(trimethyl)silane		-	254.113
9-hydroxyfluorene				9-hydroxyfluorene trimethylsilyl ether
(9-HF)				(9-HF-TMS)
(4-hydroxyphenyl)-phenylmethanone		1137-42-4	198.221	phenyl-(4-trimethylsilyloxyphenyl)methanone		33663-72-8	270.108
4-hydroxybenzophenone				4-hydroxybenzophenone trimethylsilyl ether
(H-BP)				(H-BP-TMS)
4-nonylphenol		104-40-5	220.356	4-nonylphenol trimethylsilyl ether		-	292.22
4-nonylphenol				(4-NP-TMS)
(4-NP)
(2S)-2-(6-methoxynaphthalen-2-yl)propanoic acid		22204-53-1	230.263	trimethylsilyl 2-(6-methoxynaphthalen-2-yl)propanoate		74793-83-2	302.134
naproxen				naproxen trimethylsiylyl ester
(NAP)				(NAP-TMS)
(2,4-dihydroxyphenyl)-phenylmethanone		131-56-6	214.22	[2,4-bis(trimethylsilyloxy)phenyl]-phenylmethanone		-	358.142
2,4-dihydroxybenzophenone				(2,4-dihydroxyphenyl)-phenylmethanone bis trimethylsilyl ether
(DH-BP)				(DH-BP-2TMS)
4-(4-hydroxyphenyl)phenol		92-88-6	186.21	4-(4-hydroxyphenyl)phenol bis-trimethylsilyl ether		-	330.147
4,4'-biphenol				4,4'-biphenol bis-trimethylsilyl ether
(4,4'-BP)				(4,4’-BP-2TMS)
2-(3-benzoylphenyl)propanoic acid		22071-15-4	254.285	trimethylsilyl 2-(3-benzoylphenyl)propanoate		-	326.134
ketoprofen				ketoprofen trimethylsilyl ester
(KET)				(KET-TMS)
4-aminobenzenesulfonamide		63-74-1	172.202	N-trimethylsilyl sulfanilamide (SFA-TMS)		-	244.07
sulfanilamide				N,N’-bis (trimethylsilyl) sulfanilamide		-	316.11
(SFA)				(SFA-2TMS)
(2-hydroxy-4-methoxyphenyl)-(2-hydroxyphenyl)methanone		131-53-3	244.246	(4-methoxy-2-trimethylsilyloxyphenyl)-(2-trimethylsilyloxyphenyl)methanone		-	388.153
dioxybenzone				dioxybenzone bis-trimethylsilyl ether
				(BP-8-2TMS)
benzo[b][1]benzazepine-11-carboxamide		298-46-4	236.274	N-trimethylsilylbenzo[b][1]benzazepine-11-carboxamide		-	308.135
carbamazepine				carbamazepine trimethylsilyl
(CBZ)				(CBZ-TMS)
2-[2-(2,6-dichloroanilino)phenyl]acetic acid		15307-86-5	296.147	trimethylsilyl 2-[2-(2,6-dichloroanilino)phenyl]acetate		-	367.056
diclofenac				diclofenac, trimethylsilyl ester
(DF)				(DF-TMS)
2-methyl-2-(4-methylpent-3-enyl)-7-pentylchromen-5-ol		20675-51-8	314.469	-		-	386.264
cannabichromene				cannabichromene trimethylsilyl ether
(CBC)				(CBC-TMS)
(6aR,10aR)-6,6,9-trimethyl-3-pentyl-6a,7,8,10a-tetrahydrobenzo[c]chromen-1-ol		6465-30-1	314.469	trimethyl-[(6,6,9-trimethyl-3-pentyl-6a,7,8,10a-tetrahydrobenzo[c]chromen-1-yl)oxy]silane		-	386.264
Δ9-tetrahydrocannabinol				Δ9-tetrahydrocannabinol-O-trimethylsilyl
(THC)				(THC-TMS)
6,6,9-trimethyl-3-pentylbenzo[c]chromen-1-ol		521-35-7	310.437	trimethyl-(6,6,9-trimethyl-3-pentylbenzo[c]chromen-1-yl)oxysilane		-	382.23
cannabinol (CBN)				cannabinol-O-trimethylsilyl (CBN-TMS)
(8R,9S,13S,14S)-3-hydroxy-13-methyl-7,8,9,11,12,14,15,16-octahydro-6H-cyclopenta[a]phenanthren-17-one		53-16-7	270.372	13-methyl-3-trimethylsilyloxy-7,8,9,11,12,14,15,16-octahydro-6H-cyclopenta[a]phenanthren-17-one		-	342.202
estrone				estrone trimethtylsilyl ether
(E1)				(E1-TMS)
(6aR,10aR)-1-hydroxy-6,6,9-trimethyl-3-pentyl-6a,7,8,10a-tetrahydrobenzo[c]chromene-2-carboxylic acid		23978-85-0	344.451	Δ9-tetrahydrocannabinolic acid-di-trimethylsilyl		-	502.294
Δ9-tetrahydrocannabinolic acid (THCA)				(THCA-2TMS)
(8R,9S,13S,14S,17S)-13-methyl-6,7,8,9,11,12,14,15,16,17-decahydrocyclopenta[a]phenanthrene-3,17-diol		50-28-2	272.388	trimethyl-[[(8R,9S,13S,14S,17S)-13-methyl-3-trimethylsilyloxy-6,7,8,9,11,12,14,15,16,17-decahydrocyclopenta[a]phenanthren-17-yl]oxy]silane		5150-62-9	416.257
17-β-estradiol				17-β-estradiol bis-trimethylsilyl ether
(E2)				(E2-2TMS)
(8R,9S,13S,14S,17R)-17-ethynyl-13-methyl-7,8,9,11,12,14,15,16-octahydro-6H-cyclopenta[a]phenanthrene-3,17-diol		57-63-6	296.41	17-α-ethinylestradiol bis-trimethylsilyl ether		-	368.217
17-α-ethinylestradiol (EE2)				(EE2-TMS)
(8R,9S,13S,14S,16R,17R)-13-methyl-6,7,8,9,11,12,14,15,16,17-decahydrocyclopenta[a]phenanthrene-3,16,17-triol		50-27-1	288.387	trimethyl-[[(8R,9S,13S,14S,16R,17R)-13-methyl-3,16-bis(trimethylsilyloxy)-6,7,8,9,11,12,14,15,16,17-decahydrocyclopenta[a]phenanthren-17-yl]oxy]silane		18888-17-0	504.291
estriol				estriol tri-trimethylsilyl ether
(E3)				(E3-3TMS)
2-phenylacetic acid		103-82-2	136.15	trimethylsilyl 2-phenylacetate		2078-18-4	208.092
phenylacetic acid				phenylacetic acid trimethylsilyl ester
(PAA)				(PAA-TMS)
(2S,3R)-butane-1,2,3,4-tetrol		149-32-6	122.12	trimethyl-[(2R,3S)-1,3,4-tris(trimethylsilyloxy)butan-2-yl]oxysilane		-	410.216
erythritol				erythritol tetra-trimethylsilyl ether
(ERY)				(ERY-4TMS)
hexanedioic acid		124-04-9	146.142	bis(trimethylsilyl) hexanedioate		18105-31-2	290.137
adipic acid				adipic acid bis-trimethylsilyl ester
(AA)				(AA-2TMS)
quinolin-8-ol		148-24-3	145.16	trimethyl(quinolin-8-yloxy)silane		23111-13-9	217.092
8-hydroxyquinoline				8-hydroxyquinoline trimethylsilyl ether
(8-HQ)				(8-HQ-TMS)
4-(2,4,4-trimethylpentan-2-yl)phenol		140-66-9	206.329	trimethyl-[4-(2,4,4-trimethylpentan-2-yl)phenoxy]silane		78721-87-6	278.207
4-tert-octylphenol				4-tert-octylphenol trimethylsilyl ether
(4-OP)				(4-OP-TMS)
2-hydroxypropane-1,2,3-tricarboxylic acid		77-92-9	201.138	tris(trimethylsilyl) 2-trimethylsilyloxypropane-1,2,3-tricarboxylate		14330-97-3	480.185
citric acid				citric acid tris-trimethylsilyl ester trimethylsilyl ether
(CA)				(CA-4TMS)
(3R,5S)-3-hydroxy-1-methyl-5-pyridin-3-ylpyrrolidin-2-one		34834-67-8	192.218	1-methyl-5-pyridin-3-yl-3-trimethylsilyloxypyrrolidin-2-one		-	264.129
trans-3’-hydroxycotinine				trans-3’-hydroxycotinine trimethylsilyl ether
(T3HC)				(T3HC-TMS)
2-benzyl-4-chlorophenol		120-32-1	218.68	(2-benzyl-4-chlorophenoxy)-trimethylsilane		-	290.089
chlorophene				chlorophene trimethylsilyl ether
(CLP)				(CLP-TMS)
2-[(2-hydroxyphenyl)methyl]phenol		2467-02-9	200.237	trimethyl-[2-[(2-trimethylsilyloxyphenyl)methyl]phenoxy]silane		-	344.163
2,2′-methylenediphenol				2,2′-methylenediphenol bis-trimethylsilyl ether
(22BPF)				(22BPF-2TMS)
4-[1,1,1,3,3,3-hexafluoro-2-(4-hydroxyphenyl)propan-2-yl]phenol		1478-61-1	336.233	[4-[1,1,1,3,3,3-hexafluoro-2-(4-trimethylsilyloxyphenyl)propan-2-yl]phenoxy]-trimethylsilane		-	480.138
bisphenol AF				bisphenol AF bis-trimethylsilyl ether
(BPAF)				(BPAF-2TMS)
4-(2-phenylpropan-2-yl)phenol		599-64-4	212.292	4-cumylphenol trimethylsilyl ether		-	284.16
4-cumylphenol (HPP)				(HPP-TMS)
2-[(4-hydroxyphenyl)methyl]phenol		2467-03-0	200.237	trimethyl-[2-[(4-trimethylsilyloxyphenyl)methyl]phenoxy]silane		97993-27-6	344.163
2,4'-dihydroxydiphenylmethane				2,4'-dihydroxydiphenylmethane bis-trimethylsilyl ether
(24BPF)				(24BPF-2TMS)
4-(4-hydroxyphenoxy)phenol		1965-09-9	202.209	trimethyl-[4-(4-trimethylsilyloxyphenoxy)phenoxy]silane		-	346.142
4,4'-dihydroxydiphenyl ether (DHDPE)				(DHDPE-2TMS)
4-[(4-hydroxyphenyl)methyl]phenol		620-92-8	200.237	trimethyl-[4-[(4-trimethylsilyloxyphenyl)methyl]phenoxy]silane		18641-44-6	344.163
bisphenol F				bisphenol F bis-trimethylsilyl ether
(BPF)				(BPF-2TMS)
4-[1-(4-hydroxyphenyl)ethyl]phenol bisphenol E (BPE)		2081-08-5	214.264	bisphenol E bis-trimethylsilyl ether (BPE-2TMS)		-	358.178
4-[2-(4-hydroxyphenyl)propan-2-yl]phenol		80-05-7	228.291	trimethyl-[4-[2-(4-trimethylsilyloxyphenyl)propan-2-yl]phenoxy]silane		4387-16-0	372.194
bisphenol A				bisphenol A bis-trimethylsilyl ether
				(BPA-2TMS)
4-[2-(4-hydroxy-3-methylphenyl)propan-2-yl]-2-methylphenol		79-97-0	256.635	bisphenol C-bis-trimethylsilyl ether		-	400.225
bisphenol C (BPC)				(BPC-2TMS)
4-[2-(4-hydroxyphenyl)butan-2-yl]phenol		77-40-7	242.318	trimethyl-[4-[2-(4-trimethylsilyloxyphenyl)butan-2-yl]phenoxy]silane		-	372.194
bisphenol B				bisphenol B-bis-trimethylsilyl ether
(BPBP)				(BPB-2TMS)
(1R,2R,3S,5S)-3-benzoyloxy-8-methyl-8-azabicyclo[3.2.1]octane-2-carboxylic acid		519-09-5	289.331	trimethylsilyl 3-benzoyloxy-8-methyl-8-azabicyclo[3.2.1]octane-2-carboxylate		-	361.171
benzoylecgonine				benzoylecgonine trimethylsilyl ester
(BZECG)				(BZECG-TMS)
4-[2-(4-hydroxy-3,5-dimethylphenyl)propan-2-yl]-2,6-dimethylphenol		5613-46-7	284.399	-		-	428.257
4,4’-isopropylidenebis(2,6-dimethylphenol)				4,4’-isopropylidenebis(2,6-dimethylphenol) bis-trimethylsilyl ether
				(BP26DM-2TMS)
4-[2,2-dichloro-1-(4-hydroxyphenyl)ethenyl]phenol		14868-03-2	281.132	bisphenol Cl bis-trimethylsilyl ether		-	424.085
bisphenol Cl (BPCL)				(BPCL-2TMS)
(4R,4aR,7S,7aR,12bS)-9-methoxy-3-methyl-2,4,4a,7,7a,13-hexahydro-1H-4,12-methanobenzofuro[3,2-e]isoquinolin-7-ol		76-57-3	299.73	(9-methoxy-3-methyl-2,4,4a,7,7a,13-hexahydro-1H-4,12-methanobenzofuro[3,2-e]isoquinolin-7-yl)oxy-trimethylsilane		-	371.192
codeine				codeine trimethylsilyl ether
(COD)				(COD-TMS)
(4R,4aR,7S,7aR,12bS)-3-methyl-2,4,4a,7,7a,13-hexahydro-1H-4,12-methanobenzofuro[3,2-e]isoquinoline-7,9-diol		57-27-2	285.343	[(4R,4aR,7S,7aR,12bS)-3-methyl-7-trimethylsilyloxy-2,4,4a,7,7a,13-hexahydro-1H-4,12-methanobenzofuro[3,2-e]isoquinolin-9-yl]oxy-trimethylsilane		55449-66-6	429.216
morphine				morphine bis- trimethtylsiyl ether
(MORPH)				(MORPH-2TMS)
4-[1-(4-hydroxyphenyl)cyclohexyl]phenol		843-55-0	268.356	trimethyl-[4-[1-(4-trimethylsilyloxyphenyl)cyclohexyl]phenoxy]silane		-	412.225
bisphenol Z				bisphenol Z bis-trimethylsilyl ether
(BPZ)				(BPZ-2TMS)
(9-hydroxy-3-methyl-2,4,4a,7,7a,13-hexahydro-1H-4,12-methanobenzofuro[3,2-e]isoquinolin-7-yl) acetate		2784-73-8	327.37	(3-methyl-9-trimethylsilyloxy-2,4,4a,7,7a,13-hexahydro-1H-4,12-methanobenzofuro[3,2-e]isoquinolin-7-yl) acetate		-	399.187
6-monoacetylmorphine				6-monoacetylmorphine trimethylsilyl ether
(6-MAM)				(6-MAM-TMS)
(6aR,10aR)-9-(hydroxymethyl)-6,6-dimethyl-3-pentyl-6a,7,8,10a-tetrahydrobenzo[c]chromen-1-ol		36557-05-8	330.468	-		-	474.299
11-hydroxy- Δ9-tetrahydrocannabinol
				11-hydroxy- Δ9-tetrahydrocannabinol bis-trimethylsilyl ether
(11-OH-THC)				(11-OH-THC-2TMS)
4-(4-hydroxyphenyl)sulfonylphenol		80-09-1	250.286	bisphenol S bis-trimethylsilyl ether		-	394.109
bisphenol S (BPS)				(BPS-2TMS)
4-[1-(4-hydroxyphenyl)-1-phenylethyl]phenol		1571-75-1	290.362	trimethyl-[4-[1-phenyl-1-(4-trimethylsilyloxyphenyl)ethyl]phenoxy]silane		-	434.21
bisphenol AP				bisphenol AP bis-trimethylsilyl ether
(BPAP)				(BPAP-2TMS)
(6aS,10aS)-1-hydroxy-6,6-dimethyl-3-pentyl-6a,7,8,10a-tetrahydrobenzo[c]chromene-9-carboxylic acid		104874-50-2	344.44	trimethylsilyl 6,6-dimethyl-3-pentyl-1-trimethylsilyloxy-6a,7,8,10a-tetrahydrobenzo[c]chromene-9-carboxylate		-	488.278
11-nor-9-carboxy- Δ9-tetrahydrocannabinol				11-nor-9-carboxy- Δ9-tetrahydrocannabinol trimethylsilyl ether trimethylsilyl ester
(11N9THC)				(11N9THC-2TMS)
4-[2-[3-[2-(4-hydroxyphenyl)propan-2-yl]phenyl]propan-2-yl]phenol		13595-25-0	346.47	-		-	490.272
bisphenol M				bisphenol M bis-trimethylsilyl ether
(BPM)				(BPM-2TMS)
4-[2-[4-[2-(4-hydroxyphenyl)propan-2-yl]phenyl]propan-2-yl]phenol		2167-51-3	346.47	trimethyl-[4-[2-[4-[2-(4-trimethylsilyloxyphenyl)propan-2-yl]phenyl]propan-2-yl]phenoxy]silane		-	462.241
bisphenol P				bisphenol P bis-trimethylsilyl ether
(BPAP)				(BPP-2TMS)
4-[(4-hydroxyphenyl)-diphenylmethyl]phenol		1844-01-5	352.443	-		-	496.225
bisphenol BP				bisphenol BP bis-trimethylsilyl ether
(BPBP)				(BPBP-2TMS)
4-[2-(4-hydroxy-3-phenylphenyl)propan-2-yl]-2-phenylphenol		24038-68-4	380.487	-		-	524.257
bisphenol PH				bisphenol PH bis-trimethylsilyl ether
(BPPH)				(BPPH-2TMS)
4-[9-(4-hydroxyphenyl)fluoren-9-yl]phenol		3236-71-3	350.417	trimethyl-[4-[9-(4-trimethylsilyloxyphenyl)fluoren-9-yl]phenoxy]silane		-	494.21
bisphenol FL				bisphenol FL bis-trimethylsilyl ether
(BPFL)				(BPFL-2TMS)
2,4-dihydroxy-3-[(1R,6R)-3-methyl-6-prop-1-en-2-ylcyclohex-2-en-1-yl]-6-pentylbenzoic acid cannabidiolic acid (CBDA)		1244-58-2	354.446	-		-	575.015
				cannabidiolic acid, trimethylsilyl ester
				(CBDA-3TMS)
2,6-ditert-butyl-4-methylphenol		128-37-0	220.356	3.5-di-t-butyl-4-trimethylsilyloxytoluene		18510-49-1	292.5
butylated hydroxytoluene				Butylated hydroxytoluene trimethylsilyl ether
(BHT)				(BHT-TMS)
urea urea (UA)		57-13-6	50.056	1,3-bis (trimethylsilyl) urea		18297-63--7	204.418
				urea-bis(trimethylsilyl) ether
				(UA-2TMS)
(S)-2-amino-3-hydroxypropanoic acid		56-45-1	105.093	trimethylsilyl (2S)-2-(trimethylsilylamino)-3-trimethylsilyloxypropanoate		64625-17-8	321.636
L-serine				N,O,O-tris(trimethylsilyl)-L-serine
(LSER)				(LSER-3TMS)
(2S)-2-amino-4-methylpentanoic acid L-leucine (LLEU)		61-90-5	131.175	trimethylsilyl 2-amino-4-methylpentanoate O-trimethylsilyl leucine		-	203.35
				trimethylsilyl (2S)-4-methyl-2-(trimethylsilylamino)pentanoate		-	275.535
				N,O-tris(trimethylsilyl) leucine
				(LLEU-2TMS)
(2S)-2-amino-3-(4-hydroxyphenyl)propanoic acid		60-18-4	181.191	trimethylsilyl (2S)-2-(trimethylsilylamino)-3-(4-trimethylsilyloxyphenyl)propanoate		-	397.7
L-tyrosine				N,O,O-tris(trimethylsilyl)-L-tyrosine
(LTYR)				(LTYR-3TMS)
(2R)-2-[(1S)-1,2-dihydroxyethyl]-3,4-dihydroxy-2H-furan-5-one		50-81-7	176.124	2-[1,2-bis(trimethylsilyloxy)ethyl]-3,4-bis(trimethylsilyloxy)-2H-furan-5-one		55517-56-1	462.21
L-ascorbic acid				2,3,5,6-tetra(trimethylsilyl)-L-ascorbic acid
(LAA)				(LAA-4TMS)
2-methoxy-4-nitrophenol		3251-56-1	169.136	(2-methoxy-4-nitrophenoxy)-trimethylsilane		-	241.32
4-nitroguaiacol				4-nitroguaiacol trimethylsilyl ester
				(4NG-TMS)
2-methoxy-5-nitrophenol		636-93-1	169.13	(2-methoxy-5-nitrophenoxy)-trimethylsilane		-	241.32
5-nitroguaiacol				5-nitroguaiacol trimethylsilyl ester
(5NG)				(5NG-TMS)
2-methoxy-6-nitrophenol		15969-08-1	169.13	(2-methoxy-6-nitrophenoxy)-trimethylsilane		-	241.32
6-niroguaiacol				6-nitroguaiacol trimethylsilyl ester
(6NG)				(6NG-TMS)
benzene-1,2-diol		120-80-9	110.11	trimethyl-(2-trimethylsilyloxyphenoxy)silane		5075-52-5	254.47
catechol				catechol bis(trimethylsilyl)ester
(CAT)				(CAT-2TMS)
3-methylbenzene-1,2-diol 3-methylcatechol (3MC)		488-17-5	124.137	-		-	268.5
				3-methylcatechol bis(trimethylsilyl)ether
				(3MC-2TMS)
3-methyl-5-nitrobenzene-1,2-diol		5378-76-7	169.135	-		-	313.5
3-methyl-5-nitrocatechol				3-methyl-5-nitrocatechol bis (trimethylsilyl) ether
(3M5NC)				(3M5NC-2TMS)
4-nitrobenzene-1,2-diol		3316-09-4	155.108	-		-	299.47
4-nitrocatechol				4-nitrocatechol bis(trimethylsilyl)ether
(4NC)				(4NC-2TMS)
2,6-dimethoxyphenol		91-10-1	154.163	(2,6-dimethoxyphenoxy)-trimethylsilane		-	226.34
syringol				syringol trimethylsilyl ether
(SYR)				(SYR-TMS)
2,6-dimethoxy-4-nitrophenol		19978-25-7	199.162	-		-	271.34
4-nitrosyringol				4-nitrosyringol trimethylsilyl ether
(4-NS)				(4-NS-TMS)
1-phenylpropan-2-amine		300-62-9	135.21	1-phenyl-N-trimethylsilylpropan-2-amine		14629-65-3	221.41
amphetamine				amphetamine N-trimethylsilyl ether
(AMP)				(AMP-TMS)
(2S)-N-methyl-1-phenylpropan-2-amine methamphetamine (MAMP)		537-46-2	149.237	N-methyl-1-phenyl-N-trimethylsilylpropan-2-amine		-	221.41
				methamphetamine N-trimethylsilyl ether
				(MAMP-TMS)
7-(2-hydroxyethyl)-1,3-dimethylpurine-2,6-dione		519-37-9	22.4.220	1,3-dimethyl-7-(2-trimethylsilyloxyethyl)purine-2,6-dione		-	296.4
etofylline				etofylline tirimethylsilyl ether
(ETO)				(ET-TMS)
(E)-3-(4-hydroxyphenyl)prop-2-enoic acid		501-98-4	164.16	trimethylsilyl (E)-3-(4-trimethylsilyloxyphenyl)prop-2-enoate		10517-30-3	308.52
p-coumaric acid				p-coumaric acid bis(trimethylsilyl) ether
(PCA)				(PCA-2TMS)
(E)-3-(3-hydroxyphenyl)prop-2-enoic acid		14755-02-3	164.16	trimethylsilyl (E)-3-(3-trimethylsilyloxyphenyl)prop-2-enoate		32426-62-3	308.52
m-coumaric acid				m-coumaric acid bis(trimethylsilyl) ether
(MCA)				(MCA-2TMS)
(E)-3-(2-hydroxyphenyl)prop-2-enoic acid		614-60-8	164.16	trimethylsilyl (E)-3-(2-trimethylsilyloxyphenyl)prop-2-enoate		32342-01-1	308.52
o-coumaric acid				o-coumaric acid bis(trimethylsilyl) ether
(OCA)				(OCA-2TMS)
5-nitroquinolin-8-ol		4008-48-4	190.16	trimethyl-(5-nitroquinolin-8-yl)oxysilane		-	262.34
nitroxoline				nitroxoline trimethylsilyl ether
(NX)				(NX-TMS)
(8R,9S,10R,13S,14S,17R)-17-acetyl-17-hydroxy-10,13-dimethyl-2,6,7,8,9,11,12,14,15,16-decahydro-1H-cyclopenta[a]phenanthren-3-one		68-96-2	330.46	17-acetyl-10,13-dimethyl-17-trimethylsilyloxy-2,6,7,8,9,11,12,14,15,16-decahydro-1H-cyclopenta[a]phenanthren-3-one		-	402.26
17α-hydroxyprogesterone				17α-hydroxyprogesterone trimethylsilyl ether
(17HP)				(17HP-TMS)
-		-	330.22	-		-	402.26
6β-hydroxypregnenolone				6β-hydroxypregnenolone trimethylsilyl ether
(6HP)				(6HP-TMS)
(3S,8R,9S,10R,13S,14S,17S)-10,13-dimethyl-2,3,4,7,8,9,11,12,14,15-decahydro-1H-cyclopenta[a]phenanthrene-3,17-diol		521-17-5	290.22	-		-	361.61
5-androsten-3beta, 17beta-diol				5-androsten-3beta, 17beta-diol trimethylsilyl ether
				(5AD-TMS)
				-		-	434.8
				5-androsten-3beta, 17beta-diol bis(trimethylsilyl) ether
(5AD)				(5AD-2TMS)
(8R,9S,10R,13S,14S,17S)-17-hydroxy-10,13-dimethyl-6,7,8,9,11,12,14,15,16,17-decahydrocyclopenta[a]phenanthren-3-one		846-48-0	286.4	10,13-dimethyl-17-trimethylsilyloxy-6,7,8,9,11,12,14,15,16,17-decahydrocyclopenta[a]phenanthren-3-one		-	358.59
5α-dehydrotestosterone				boldenone trimethylsilyl ether (BD-TMS)
boldenone (BD)
(8S,9S,10R,11R,13S,14S,17S)-11,17-dihydroxy-10,13-dimethyl-1,2,6,7,8,9,11,12,14,15,16,17-dodecahydrocyclopenta[a]phenanthren-3-one		3066-12-4	304.204	-		-	448.786
11α-hydroxytestosterone				11α-hydroxytestosterone bis(trimethylsilyl) ether
(11HT)				(11HT-2TMS)
(8S,9S,10R,11R,13S,14S)-11-hydroxy-10,13-dimethyl-2,6,7,8,9,11,12,14,15,16-decahydro-1H-cyclopenta[a]phenanthrene-3,17-dione		564-33-0	302.408	-		-	374.589
11α-hydroxyandrostenedione				11α-hydroxyandrostenedione trimethylsilyl ether
(11HAD)				(11HAD-TMS)
2-(2-anilinophenyl)acetic acid		70172-33-7	227.259	-		-	299.44
2-anilinophenylacetic acid				2-anilinophenylacetic acid trimethylsilyl ether
(2APA)				(2APA-TMS)
(5S,8R,9S,10S,13S,14S,17S)-17-hydroxy-10,13-dimethyl-1,2,4,5,6,7,8,9,11,12,14,15,16,17-tetradecahydrocyclopenta[a]phenanthren-3-one		521-18-6	290.44	-		-	362.621
dihydrotestosterone				stanolone trimethylsilyl ether
stanolone				(ST-TMS)
				-		-	434.803
				stanolone bis(trimethylsilyl) ether
(ST)				(ST-2TMS)
